# Supplementary material for: Identification of Epithelial–Mesenchymal Transition-Related Prognostic lncRNAs Biomarkers Associated With Melanoma Microenvironment
Source: Front Cell Dev Biol. 2021 May 31;9:679133. doi: 10.3389/fcell.2021.679133 (PMC8201078; doi:10.3389/fcell.2021.679133)
Supplement: Supplementary file 1 [file Table_1.XLSX]

## Sheet: Sheet1
supplementary Table S1: EMT-related genes
COL3A1
COL5A2
COL5A1
FBN1
COL1A1
FN1
COL6A3
SERPINE1
COL1A2
COL4A1
COL4A2
VCAN
IGFBP3
TGFBI
SPARC
LUM
LAMC1
LOX
LAMC2
CCN2
TAGLN
COL7A1
LOXL2
COL6A2
ITGAV
THBS2
COL16A1
NNMT
TPM1
CDH2
MMP2
COL11A1
THBS1
FAP
BGN
SERPINH1
FSTL1
POSTN
THY1
SPP1
TNC
TFPI2
NID2
ITGB5
MMP3
VIM
LOXL1
FBLN5
COL12A1
ELN
CDH11
COMP
SPOCK1
BMP1
IL32
LAMA3
TIMP1
QSOX1
TIMP3
VCAM1
CCN1
EDIL3
CALD1
MAGEE1
FBLN1
SGCB
ECM1
LAMA2
FSTL3
TPM2
INHBA
DAB2
EMP3
BASP1
ITGA5
MGP
VEGFA
CXCL1
WNT5A
SDC1
PLOD2
PCOLCE
GREM1
ITGB1
COL5A3
RHOB
HTRA1
FGF2
SNTB1
GADD45A
MEST
LRRC15
TNFRSF11B
CD59
ACTA2
EFEMP2
MATN2
PCOLCE2
SERPINE2
GPC1
ABI3BP
FUCA1
SLIT3
LAMA1
PMEPA1
COL8A2
FBN2
IGFBP2
PFN2
SDC4
CD44
GADD45B
CXCL8
GLIPR1
ANPEP
P3H1
VEGFC
MMP14
SGCD
PLOD1
MATN3
MYL9
SLC6A8
CALU
PRRX1
TNFRSF12A
FMOD
ID2
GEM
PLAUR
MYLK
TGFB1
SFRP1
PLOD3
IL6
APLP1
FBLN2
MSX1
PTX3
FZD8
JUN
FERMT2
DKK1
SNAI2
DST
TPM4
DCN
GJA1
PMP22
IGFBP4
COPA
LRP1
ITGA2
FLNA
MFAP5
PTHLH
TGFBR3
SFRP4
LGALS1
RGS4
CDH6
SAT1
NT5E
DPYSL3
PPIB
TGM2
SGCG
ITGB3
PDLIM4
CTHRC1
ECM2
CRLF1
AREG
IL15
MCM7
GAS1
PRSS2
CADM1
OXTR
SCG2
CXCL6
MMP1
TNFAIP3
CAPG
CAP2
MXRA5
FOXC2
NTM
ENO2
FAS
BDNF
ADAM12
PVR
CXCL12
PDGFRB
SLIT2
NOTCH2
COLGALT1
GPX7
WIPF1
