# Supplementary material for: Identification of Epithelial–Mesenchymal Transition-Related Prognostic lncRNAs Biomarkers Associated With Melanoma Microenvironment
Source: Front Cell Dev Biol. 2021 May 31;9:679133. doi: 10.3389/fcell.2021.679133 (PMC8201078; doi:10.3389/fcell.2021.679133)
Supplement: Supplementary file 2 [file Table_2.xlsx]

## Sheet: Sheet1
Table S2: The p-value and HR of selected lncRNAs in univariable Cox regression analysis (p < 0.01)
lncRNA	HR	HR.95L	HR.95H	pvalue
LINC00324	0.582858	0.453063	0.749838	2.67023e-05
AC083799.1	0.86834	0.808607	0.932485	0.000103471
LINC02560	1.05627	1.02745	1.0859	0.000104904
HCP5	0.974332	0.961131	0.987714	0.000186931
AC093010.2	0.941532	0.912164	0.971846	0.000194307
PSMB8-AS1	0.947358	0.919859	0.975679	0.000320413
NCK1-DT	0.693567	0.568151	0.846667	0.000323724
HLA-DQB1-AS1	0.815284	0.729364	0.911326	0.00032544
LINC01943	0.605327	0.460281	0.796081	0.000328552
USP30-AS1	0.830667	0.748397	0.92198	0.000489342
AC093726.1	0.828441	0.744532	0.921806	0.000551685
AL590764.1	0.598445	0.445219	0.804405	0.000668266
AL133371.2	0.689296	0.555355	0.855542	0.000737461
TRBV11-2	0.760493	0.648274	0.892138	0.000776258
AC242842.1	0.747757	0.630725	0.886504	0.000816364
LINC01871	0.91807	0.873214	0.96523	0.000823918
IRF1-AS1	0.545925	0.381283	0.781661	0.000949574
CCR5AS	0.583119	0.42346	0.802975	0.000952325
TRG-AS1	0.717821	0.589441	0.874164	0.000974897
AC243960.1	0.820614	0.727502	0.925644	0.00129367
AC099343.4	0.755983	0.635467	0.899353	0.00159286
MIR155HG	0.844409	0.759964	0.938236	0.00165579
AC018755.4	0.743461	0.617951	0.894461	0.00167685
PCED1B-AS1	0.902968	0.847256	0.962342	0.00168188
AL162457.2	1.01247	1.00464	1.02035	0.00174362
VIM-AS1	0.684893	0.536609	0.874154	0.00236283
LINC01150	0.634411	0.47121	0.854136	0.00270818
AL136295.7	0.717405	0.574814	0.895368	0.00330872
AC055822.1	0.663279	0.503653	0.873496	0.00346847
LINC02328	0.628065	0.459455	0.85855	0.00354346
PAXIP1-AS2	0.799286	0.684805	0.932906	0.0045039
MIAT	0.714437	0.566154	0.901556	0.00460989
AC138207.5	0.88716	0.816544	0.963883	0.00466669
AC136475.3	0.861551	0.775529	0.957116	0.00549213
AL365361.1	0.824432	0.719174	0.945095	0.00560107
AC036108.3	0.703387	0.548267	0.902394	0.00564155
AC068234.2	0.950877	0.917356	0.985623	0.00594506
AC022706.1	0.705411	0.547426	0.90899	0.00698471
AC090559.1	0.78935	0.664129	0.938183	0.00727461
AC009495.1	1.06416	1.01675	1.11379	0.00748312
LINC02446	0.894316	0.823977	0.970659	0.007529
AC015911.3	0.751487	0.608738	0.92771	0.00785869
EBLN3P	0.931518	0.883769	0.981846	0.00823259
AC003956.1	1.41166	1.09241	1.8242	0.00839774
AC124804.1	1.09035	1.02232	1.16289	0.00849547
CARD8-AS1	0.849436	0.751803	0.959748	0.00880682
SPRY4-AS1	0.758134	0.616016	0.933039	0.00893976
MMP25-AS1	0.728554	0.572836	0.926602	0.00984254
AC005840.4	0.588159	0.392901	0.880454	0.00992334
