# Supplementary material for: Identification of Epithelial–Mesenchymal Transition-Related Prognostic lncRNAs Biomarkers Associated With Melanoma Microenvironment
Source: Front Cell Dev Biol. 2021 May 31;9:679133. doi: 10.3389/fcell.2021.679133 (PMC8201078; doi:10.3389/fcell.2021.679133)
Supplement: Supplementary file 3 [file Table_3.XLSX]

## Sheet: Sheet1
Table S3: The correlation coefficient and HR of 8 EMT-related lncRNAs from multivariate Cox regression analysis.
lncRNA	coef	HR	HR.95L	HR.95H	pvalue
LINC02560	0.0432538	1.0442	1.01416	1.07513	0.00368257
AC083799.1	-0.0747787	0.927949	0.864753	0.995763	0.037715
AC036108.3	-0.165832	0.847188	0.692573	1.03632	0.106756
HLA-DQB1-AS1	-0.112172	0.893891	0.797931	1.00139	0.0528691
AC009495.1	0.0608717	1.06276	1.01177	1.11633	0.0152507
SPRY4-AS1	-0.203178	0.816133	0.674077	0.988127	0.0373081
AC124804.1	0.0681405	1.07052	1.00477	1.14057	0.0351131
TRG-AS1	-0.191772	0.825495	0.685937	0.993448	0.0424037
